# Supplementary material for: Sustained Effectiveness of Secukinumab Across Different Body Regions in Patients with Moderate-to-Severe Plaque Psoriasis from the PURE Registry
Source: Springer Nature journal article supplement (doi:10.1007/s13555-022-00870-3), 2022-12-23
Supplement: MOESM1 [file 23855240]

***Dermatology and Therapy***

**Electronic Supplementary Material**

# **Sustained Effectiveness of Secukinumab Across Different Body Regions in Patients with Moderate to Severe Plaque Psoriasis from the PURE Registry**

Melinda Gooderham1, Kim A. Papp2, Charles Lynde3, Isabelle Delorme4, Jennifer Beecker5, Lorne Albrecht6, Ignacio Dei-Cas7, Danielle Brassard8, Vimal H. Prajapati9, Antonio Vieira10, Lenka Rihakova10

1SKiN Centre for Dermatology and Probity Medical Research, Peterborough, and Queen’s University, Kingston, ON, Canada; 2K Papp Clinical Research and Probity Medical Research, Waterloo, ON, Canada; 3Lynde Institute for Dermatology, University of Toronto and Probity Medical Research, Markham, ON, Canada; 4Dr. Isabelle Delorme Inc., Drummondville, QC, Canada; 5Division of Dermatology, University of Ottawa, Ottawa Hospital Research Institute and Probity Medical Research, Ottawa, ON, Canada; 6Enverus Medical Research, University of British Columbia and Probity Medical Research, Surrey, BC, Canada; 7Psoriasis BsAs, Hospital Pte Perón, Universidad de Buenos Aires, Buenos Aires, Argentina; 8Clinique D, Laval, QC, Canada; 9Division of Dermatology, Department of Medicine, University of Calgary, Calgary, AB, Canada; Division of Pediatric Rheumatology, Department of Pediatrics, University of Calgary, Calgary, AB, Canada; Division of Community Pediatrics, Department of Pediatrics, University of Calgary, Calgary, AB, Canada; Dermatology Research Institute, Calgary, AB, Canada; Skin Health & Wellness Centre, Calgary, AB, Canada; Probity Medical Research, Calgary, AB, Canada; 10Novartis Pharmaceuticals Canada Inc., Dorval, QC, Canada

**Corresponding Author:**

Dr. Melinda Gooderham

SKiN Centre for Dermatology, Peterborough, Queen’s University, Kingston and Probity Medical Research, Peterborough, ON, Canada.

Email address: mgooderham@centrefordermatology.com

Contact number: +1 705.775.7546

**Table S1**: List of ethics committees or institutional review boards for PURE study

| **Name and Address** | **Chair** |
| --- | --- |
| Research Review Board Inc.,19–13,085 Yonge Street, Richmond Hill, Ontario, Canada, L4E 0 K2. | Mr. Neil Malhotra |
| Ottawa Health Science Network Research Ethics Board, 725 Parkdale Avenue, Ottawa, Ontario, Canada, K1Y 4E9. | Dr. Raphael Saginur |
| University of Manitoba, Biomedical Research Board, P126–770 Bannatyne Avenue, Winnipeg, Manitoba, Canada, R3E 0 W3. | Dr. Lindsay Nicolle |
| University of British Columbia, Clinical Research Ethics Board, 828 West,10th Avenue Vancouver, British Columbia, Canada, V5Z 1 L8. | Dr. Stephen Hoption Cann |
| Newfoundland and Labrador Health Research Ethics Board, 95 Bonaventure Avenue, St. John’s, Newfoundland and Labrador, Canada, A1B 2X5. | Ms. Regina Coady |
| Hamilton Integrated Research Ethics Board, 293 Wellington Street North, Hamilton Ontario, L8L 8E7 | Dr. Mark Inman and  Dr. Raelene Rathbone |
| Health Research Ethics Board of Alberta, 1500, 10,104–103 Avenue NW Edmonton, Alberta, Canada, T5J 4A7. | Mr. Peter Venner |
| Health Research Ethics Board, Health Research Ethics Authority Suite 200, 2nd floor, 95 Bonaventure Avenue, St. John’s, Newfoundland and Labrador, Canada, A1B 2X5. | Dr. Craig Pochini (Co-Chair, clinical Trials Health Research ethics board) |
| Nova Scotia Health Authority Research Ethics Board, 5790 University Avenue Halifax, Nova Scotia, Canada, B3H 1 V7. | Dr. Chris MacKnight |
| Queen's university Health Sciences and Affiliated Teaching Hospitals Research Ethics Board (HSREB). Fleming Hall/Jemmett Wing, 3rd floor 78 Fifth Field Company Lane, Queen's University Kingston, Ontario, Canada, K7L 3N6 | Dr Albert Clark |
| Comité Independiente de Etica para Ensayos en Farmacología Clínica, Uriburu 774 First floor, CABA, Argentina | Dr. Fabiana Beatriz Ibelli |
| Comité de Ética de Protocolos de Investigación, J. D. Perón 4190, CABA, Argentina | Dr. Carlos Burger |
| Comité de Bioética CIMeL, Tucumán 1314, Lanús, Provincia de Buenos Aires, Argentina | Dr. Gamallo, Fabián Augusto |
| Comité de Ética e Investigación de la Fundación Sanatorio Güemes, F. Acuña de Figueroa 1240, 20 floor, CABA, Argentina | Ms. Estela Juana Izquierdo |
| Comitê de Ética em pesquisa do Hospital do Servidor Publico Municipal de São Paulo, Rua Castro Alves, 60 (Aclimação), Sao Paulo, Sao Paulo | Not available (Brazil was closed in 2017) |
| Instituto Costarricense de Investigaciones Clinicas, Mata redonda, barrio morenos, urbanización paseo colón, calle 42- Avenida 20 y 22, Costa Rica | Dr. Jessie Orlich Montejo |
| Comite de Etica Zuggueme, 3ª calle 11-36 ZONA 15, COLONIA TECUN UMAN, Guatemala | Mr. Jaime Buezo |
| Comité de ética Hospital Roosevelt, Calzada Roosevelt, Zona 11. Hospital Roosevelt 2 Nivel, Ciudad de Guatemala, Guatemala | Dr. Jose Luis Chacón Montiel |
| Comité de ética Hospital Santo Tomas, Calle 37 Este, Panamá, Panamá. Hospital San Tomas 3er nivel, Ciudad de Panama, Panama | Dr. Magella de Carrillo |
| Comité de Bioetica Hospital General Plaza de la Salud, Av Ortega y Gasset, Santo Domingo, Dominican Republic. | Dr. Pavel Rodríguez |
| Comite de ética Hospital Jose Maria Cabral, Avenida Franco Bido. Santiago De los Caballeros, Dominican Republic. | Dr. Adalbertha Arjona |
| Comité de Investigación del Hospital Hispano S.A. de C.V., Pedro Moreno Número 934 Zona Centro CP 44100 Guadalajara, Jalisco, México | Dr. Carlos Miguel González Valencia  Dr. Silvia Claudina Jerez Armendáriz |
| Medica Sur, S.A.B. de C.V., Puente de Piedra 150, Col. Toriello Guerra, Tlalpan 14050, CDMX Mexico | Dr. Varenka Julieta Barbero Becerra  Dr. Norberto Carlos Chávez Tapiav |
| Comités de Ética, Investigación y Bioseguridad Hospital la Misión S.A de C.V., Del Hospital 112, 1° y 2° Piso, Oficina 204 Col. Sertoma, C.P. 64718 Monterrey N. L. México | Dr. Felipe Ángel Robledo Padilla  Dr. José Francisco Islas Cisneros |
| Promotora Médica Aguascalientes S.A. de C.V., República de Ecuador 200, Col. Americas CP 20230, Aguascalientes, Mexico | Dr. Fatima Alicia Delgado Salcedo  Dr. Martha Enue Vacio Olguin |
| Desarrollos Biomédicos y Biotecnológicos de México, S.A. de C.V.| Centro de Dermatología Quirúrgica y Estética de Monterrey, S.C., Belisario Dominguez 2303, Col. Obispado CP 64060, Monterrey, NL Mexico | Dr. Jorge Enrique Castro Garza  Dr. Enrique Javier Macias Rodriguez |
| Comité de Investigación Hospital Regional Lic. Adolfo Lopez Mateos (ISSSTE), Av. Universidad 1321; Col. Florida, CP 01030, Coyoacan, CDMX Mexico | Dr. Luis Bruno Lara Guardian  Dr. Daniel Antonio Rodriguez Araiza |
